# Supplementary material for: Instant high-selectivity Cd-MOF chemosensor for naked-eye detection of Cu(ii) confirmed using in situ microcalorimetry
Source: Royal Society of Chemistry journal article supplement (doi:10.1039/c5gc02393a), 2015-10-27
Supplement: c5gc02393a1.pdf [file c5gc02393a1.pdf]

## Supporting Information

### Instantly High-Selectivity Cd-MOF Chemosensor for Naked-Eye Detection of Cu(II) Approved by *in situ* Microcalorimetry

Chengfang Qiao,<sup>a,b</sup> Xiaoni Qu,<sup>a</sup> Qi Yang,<sup>a</sup> Qing Wei,<sup>a</sup> Gang Xie,<sup>a</sup> Sanping Chen,<sup>\*a</sup> Desuo  
Yang<sup>c</sup>

[a] Key Laboratory of Synthetic and Natural Functional Molecule Chemistry of Ministry of Education, College of  
Chemistry and Materials Science, Northwest University, Xi'an 710127, P. R. China

[b] Shaanxi Key Laboratory of Comprehensive Utilization of Tailings Resources, College of Chemical  
Engineering and Modern Materials, Shangluo University, Shangluo 726000, P. R. China

[c] College of Chemistry and Chemical Engineering, Baoji University of Arts and Sciences, Baoji 721013, P. R.  
China

Corresponding author

Prof. Sanping Chen

E-mail: sanpingchen@126.com

## Table of contents

- Fig. S1**  $^1\text{H}$  NMR (400 MHz,  $\text{CDCl}_3$ ) spectrum of triacetyltriphenylamine.
- Fig. S2**  $^1\text{H}$  NMR (400 MHz,  $\text{DMSO-}d_6$ ) spectrum of tricarboxyltriphenylamine ( $\text{H}_3\text{L}$ ).
- Fig. S3**  $^{13}\text{C}$  NMR (126 MHz,  $\text{DMSO-}d_6$ ) spectrum of tricarboxyltriphenylamine ( $\text{H}_3\text{L}$ ).
- Fig. S4** 3D framework of **1** (a) assembled *via* 2D wave-like double sheet structures (b), which were generated by two kinds of  $\text{L}^{3-}$  ligands (blue and pink balls) bridging pentanuclear  $\text{Cd(II)}$  cluster nodes (green balls). All H atoms, counter ions and solvent molecules are omitted for clarity.
- Fig. S5** View of the 3D framework of **1** shown in Ball-Stick mode (a) and Spacefill mode (b) along the *a*-axis. All H atoms, counter ions and solvent molecules are omitted for clarity.
- Fig. S6** View of the 3D framework of **1** shown in Ball-Stick mode (a) and Spacefill mode (b) along the *b*-axis. All H atoms, counter ions and solvent molecules are omitted for clarity.
- Fig. S7** View of the 3D framework of **1** shown in Ball-Stick mode (a) and Spacefill mode (b) along the *c*-axis. All H atoms, counter ions and solvent molecules are omitted for clarity.
- Fig. S8** Powder XRD patterns of (a) **1**, **1'**, **1**·DMA and **1**· $\text{CH}_3\text{OH}$ ; (b) **2** and its simulated one.
- Fig. S9** The corresponding Gram–Schmidt signal of **1**· $\text{CH}_3\text{OH}$  and **1**·DMA.
- Fig. S10** Gas phase IR spectra corresponding to the maximum of the Gram–Schmidt signal in Fig. 9 of (a) **1**· $\text{CH}_3\text{OH}$  and (b) **1**·DMA as well as reference spectra of (c) methanol and (d) N-dimethylacetamide.
- Fig. S11** TG curves for **1**, **1**· $\text{CH}_3\text{OH}$  and **1**·DMA under a nitrogen atmosphere.
- Fig. S12** (a) Variation of heat-flow as a function of time, **1**· $\text{CH}_2\text{Cl}_2$ , **1**· $\text{CHCl}_3$ , **1**· $\text{CCl}_4$ , **1**·benzene, and **1**·cyclohexane, (b) **1**· $\text{CH}_3\text{OH}$  and **1**·DMA.
- Fig. S13** Changes in color of addition of various metal ions ( $1 \times 10^{-4} \text{ mol L}^{-1}$ , 10 mL) to the crystals of **1**.
- Fig. S14** (a) Coordination environments of the  $\text{Cd(II)}$  and  $\text{Cu(II)}$  ions in **2**. Symmetry code: A,  $-x+1, -y, -z+2$ ; (b) Two different types of coordination modes of  $\text{L}^{3-}$  ligand in **2**. Symmetry code: A,  $x, y, z+1$ ; B,  $-x+1, y-1/2, -z+5/2$ ; C,  $-x+1, y+1/2, -z+3/2$ ; D,  $x+1, y, z$ ; (c) View of the 3D framework of **2** shown in Ball-Stick mode along the *c*-axis. All H atoms, counter ions and solvent molecules are omitted for clarity.
- Fig. S15** (a) Variation of heat-flow as a function of time,  $c(\text{Cu}^{2+})=1 \times 10^{-5} \text{ mol L}^{-1}$ , (b)  $c(\text{Cu}^{2+})=1 \times 10^{-6} \text{ mol L}^{-1}$ .
- Fig. S16** Change in absorption intensity of **1** ( $1 \times 10^{-5} \text{ M}$ ) in DMSO upon addition of various metal ions (10 mM).
- Fig. S17** Emission spectra of **1** in DMSO with  $\text{Cu(NO}_3)_2$  at different concentrations.
- Table S1** Crystal data and refinement parameters for compounds **1**, **2**, **1**· $\text{CH}_3\text{OH}$  and **1**·DMA.

# 1. Experimental

## 1.1. Materials and instrumentation

The H<sub>3</sub>L ligand was synthesized by the literature method.<sup>[S1]</sup> All other reagents were reagent grade and used as purchased without further purification. <sup>1</sup>H NMR spectra were recorded at 400 MHz and <sup>13</sup>C NMR spectrum was recorded on Varian INOVA 500M spectrometer. Tetramethylsilane (TMS) served as internal reference ( $\delta = 0$ ) for <sup>1</sup>H NMR, and DMSO-*d*<sub>6</sub> served as internal standard ( $\delta = 39.51$ ) for <sup>13</sup>C NMR. Elemental analyses of C, H, and N were performed on a Vario EL III analyzer fully automated trace element analyzer. The FT-IR spectra were recorded on a Nicolet Magna 750 FT-IR spectrometer using KBr pellets in the range of 4000-400 cm<sup>-1</sup>. Fluorescent data were collected on an Edinburgh FLS920 TCSPC fluorescence spectrophotometer equipped with 450W xenon light. Inductively coupled plasma (ICP) analysis was performed on a Perkin–Elmer Optima 3300 DV ICP spectrometer. Thermogravimetric analysis was investigated using a thermogravimetric analyzer at first. The gaseous products from the samples during heating under N<sub>2</sub> atmosphere were analyzed by an online FTIR (Bruker, Vertex70) with a 200 ml gas cell in the range of 400-4000cm<sup>-1</sup>. The phase purity of the bulk sample was verified by X-ray powder diffraction (XRPD) radiation ( $\lambda = 1.5406 \text{ \AA}$ ), with a scan speed of 5° min<sup>-1</sup> and a step size of 0.02° in 2 $\theta$ . The calorimetric experiment was performed by using a RD496-III type microcalorimeter.<sup>[S2]</sup> The calorimetric constants at 295.15, 298.15, 301.15, 304.15, and 307.15 K were determined, by the Joule effect, to be 63.799 ± 0.025, 63.901 ± 0.030, 64.000 ± 0.026, 64.075 ± 0.038, and 64.203 ± 0.043  $\mu\text{V} \cdot \text{mW}^{-1}$ , respectively. The enthalpy of the dissolution of KCl (spectral purity) in deionized water was measured to be 17.238 ± 0.048 kJ · mol<sup>-1</sup>, which is in good agreement with the value of 17.241 ± 0.018 kJ · mol<sup>-1</sup> from ref [S3]. The accuracy is 0.02%, and the precision is 0.3%, which indicates that the calorimetric system is accurate and reliable. The reaction solvent (5 mL) was put into a stainless steel sample cell in a 15 mL container.<sup>[S4]</sup> At equilibrium, the containers of the single crystal samples (20-22 mg) were pushed down simultaneously. As a result, the crystal solvent was mixed at 298.15 K, and the thermogram of the crystalline-state-liquid guest exchange was recorded.

### 1.2. Synthesis of tricarboxytriphenylamine ( $H_3L$ )<sup>[S1]</sup>

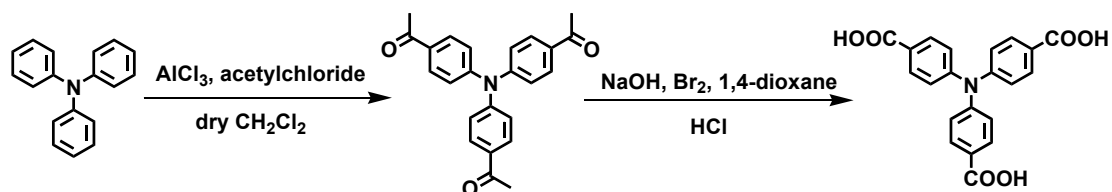

#### Synthesis of triacetyltriphenylamine

To the solution of  $AlCl_3$  (1.8 g, 13.5 mmol) in 50 ml dry  $CH_2Cl_2$ , 2.0 ml (28.28 mmol) acetyl chloride in 50 ml dry  $CH_2Cl_2$  was added dropwisely under 0 °C. The reaction mixture was allowed to warm to room temperature and triphenylamine (1.0 g, 4.0 mmol) in 50 ml dry  $CH_2Cl_2$  was added. Then the reaction was carried out at room temperature for 24 h. The mixture was poured into ice-water (200 mL), and extracted with  $CH_2Cl_2$  ( $3 \times 100$  mL), the organic layer was washed with water ( $5 \times 100$  mL), dried with  $Na_2SO_4$ . After filtration and removal of the solvent under reduced pressure, the crude product was purified by column chromatography with  $CH_2Cl_2$  as an eluent to give a yellow solid (1.20 g, 80.8%).  $^1H$  NMR (400 MHz,  $CDCl_3$ ),  $\delta$  (ppm): 7.91 (d,  $J=8.8$ , 6H), 7.16 (d,  $J=8.7$ , 6H), 2.59 (s, 9H).

#### Synthesis of tricarboxyltriphenylamine

3 mL  $Br_2$  were added dropwisely to the solution of  $NaOH$  (7 g, 0.18 mol) in 30 ml water on ice bath. The mixture was stirred for 20 min and added dropwisely to a solution of triacetyltriphenylamine (2.0 g, 5.4 mmol) in 50 ml 1, 4-dioxane. Then the reaction mixture was allowed to warm to room temperature over 1 h and further stirred at 50 °C for 12 h. After cooling to r.t., the mixture was put on ice-bath, saturated hydroxylamine hydrochloride was added to deoxidize excessive sub-bromo-sodium. The solution was acidified by  $HCl$  (2M) and the solid product was filtered and dried under vacuum. The crude was recrystallized from acetic acid to afford pure products as a white solid. (1.56 g, 76.5%). Anal. calcd. for  $C_{24}H_{21}NO_3$ : C, 77.61; H, 5.70; N, 3.77. Found: C, 77.68; H, 5.76; N, 3.71.  $^1H$  NMR (400 MHz,  $DMSO-d_6$ ),  $\delta$  (ppm): 12.85 (s, 3H), 7.92 (d,  $J=8.7$ , 6H), 7.15 (d,  $J=8.7$ , 6H).  $^{13}C$  NMR (126 MHz,  $DMSO-d_6$ )  $\delta$  (ppm): 166.81, 149.88, 131.25, 125.93, 123.78.

### 1.3. Synthesis of $\{[NH_2(CH_3)_2][Cd_{2.5}(L)_2(H_2O)] \cdot (H_2O)\}_n$ (1).

A mixture of H<sub>3</sub>L (37 mg, 0.1 mmol), CdSO<sub>4</sub>·8/3H<sub>2</sub>O (51 mg, 0.2 mmol), N,N-dimethylformamide (5 mL), acetone (4 mL) and water (3 mL) were placed in a 25 mL Teflon liner. The resulting mixture was stirred for 30 min at room temperature, and then the mixture was sealed in a Parr autolave and kept at 100°C for 3 days and then cooled to room temperature at a rate of 5 °C min<sup>-1</sup>. Yellow block crystals of **1** were obtained in 47% yield (based on H<sub>3</sub>L). Anal. Calcd for C<sub>88</sub>H<sub>72</sub>Cd<sub>5</sub>N<sub>6</sub>O<sub>28</sub> (2223.52): C, 47.36; H, 3.25; N, 3.77%. Found: C, 47.06; H, 3.49; N, 3.92%. IR (cm<sup>-1</sup>): 3446 (s), 1590 (s), 1527 (m), 1391 (s), 1318 (m), 1264 (m), 1173 (w), 1104(w), 862 (w), 791 (m), 710 (w), 682 (w).

#### 1.4. X-ray structure determinations

Diffraction intensities of all compounds were collected on a Rigaku SCX mini CCD diffractometer using graphite-mono-chromatized MoK $\alpha$  radiation ( $\lambda = 0.71073 \text{ \AA}$ ) at room temperature. The data integration and reduction were processed with SAINT software. Absorption correction based on multi-scan was performed using the SADABS program.<sup>[S5]</sup> The structures were solved by the direct method using SHELXTL and refined by a full-matrix least-squares method on  $F^2$  with the SHELXL-97 program.<sup>[S6]</sup> All non-hydrogen atoms were refined anisotropically. A summary of the crystallographic data and data collection, refinement parameters are listed in Table S1.

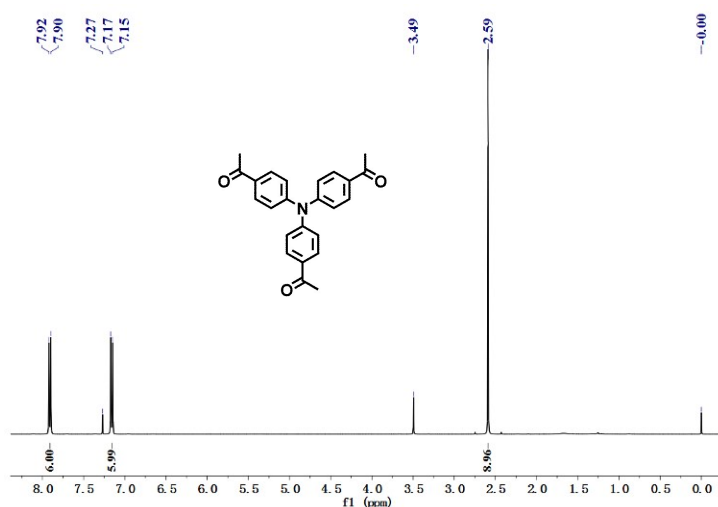

**Fig. S1** <sup>1</sup>H NMR (400 MHz, CDCl<sub>3</sub>) spectrum of triacetyltriphenylamine.

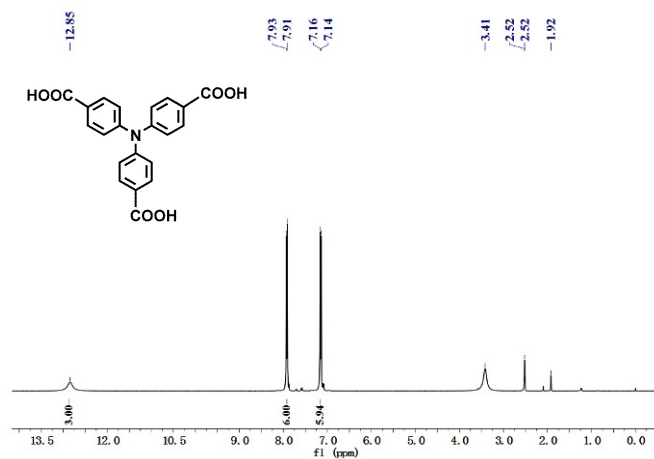

**Fig. S2**  $^1\text{H}$  NMR (400 MHz,  $\text{DMSO-}d_6$ ) spectrum of tricarboxyltriphenylamine ( $\text{H}_3\text{L}$ ).

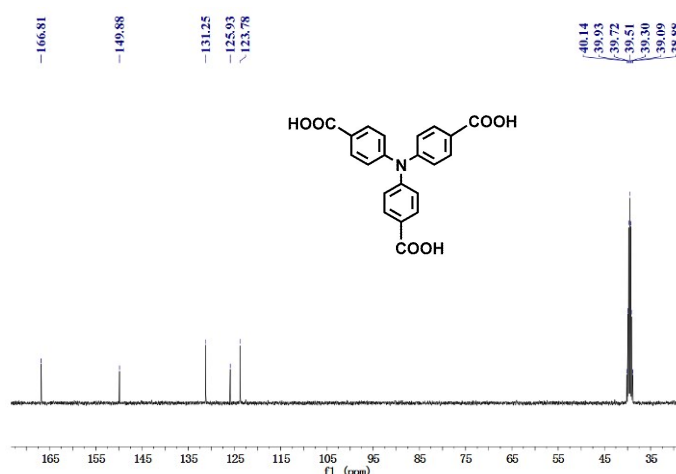

**Fig. S3**  $^{13}\text{C}$  NMR (126 MHz,  $\text{DMSO-}d_6$ ) spectrum of tricarboxyltriphenylamine ( $\text{H}_3\text{L}$ ).

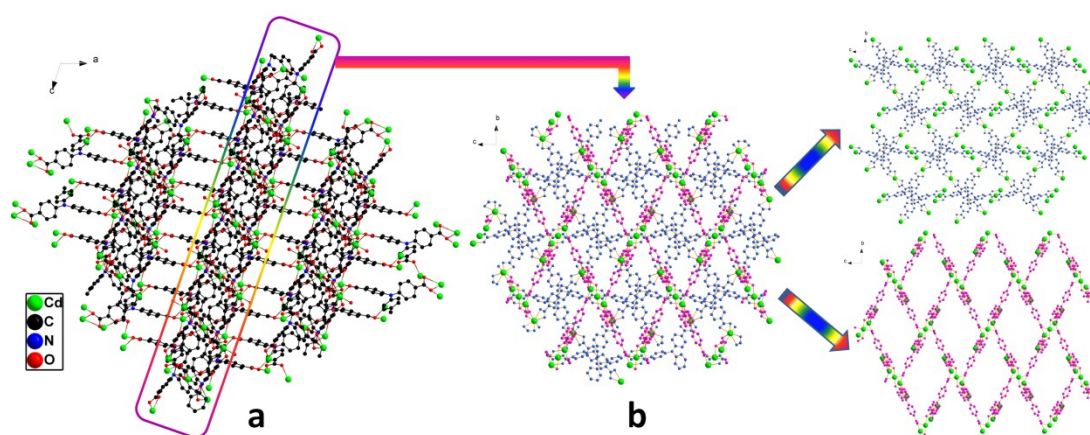

**Fig. S4** 3D framework of **1** (a) assembled *via* 2D wave-like double sheet structures (b), which were generated by two kinds of  $\text{L}^3$ -ligands (blue and pink balls) bridging pentanuclear  $\text{Cd}(\text{II})$  cluster nodes (green balls). All H atoms, counter ions and solvent molecules are omitted for clarity.

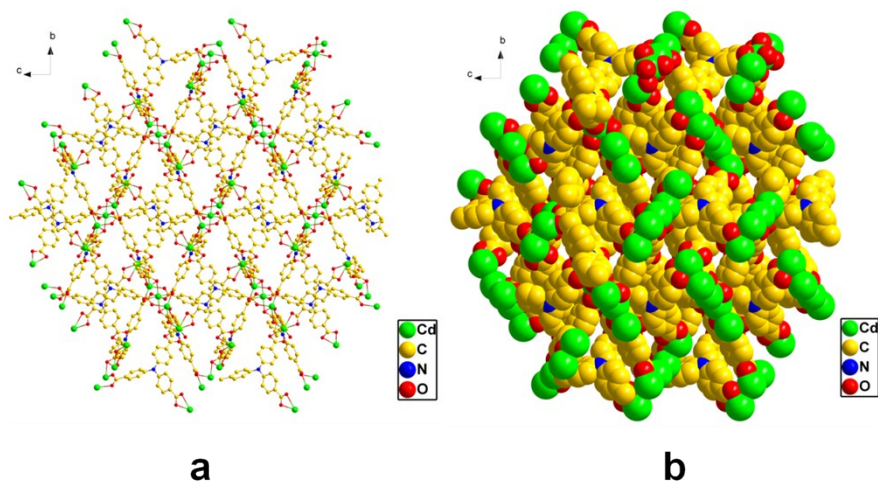

**Fig. S5** View of the 3D framework of **1** shown in Ball-Stick mode (a) and Spacefill mode (b) along the *a*-axis. All H atoms, counter ions and solvent molecules are omitted for clarity.

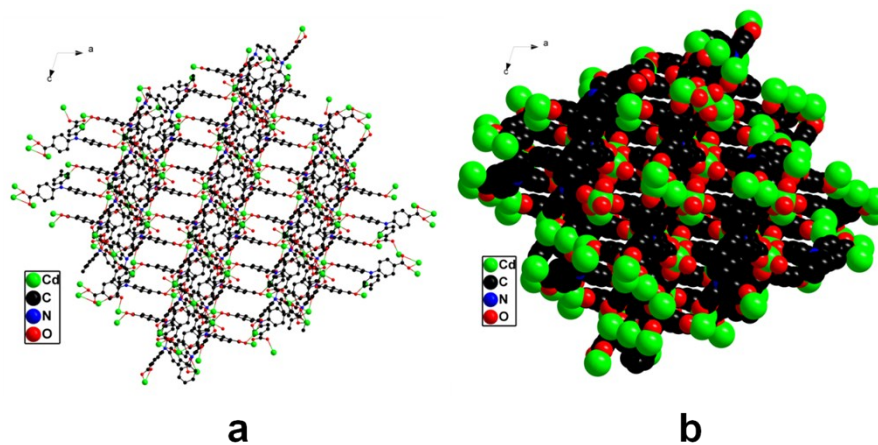

**Fig. S6** View of the 3D framework of **1** shown in Ball-Stick mode (a) and Spacefill mode (b) along the *b*-axis. All H atoms, counter ions and solvent molecules are omitted for clarity.

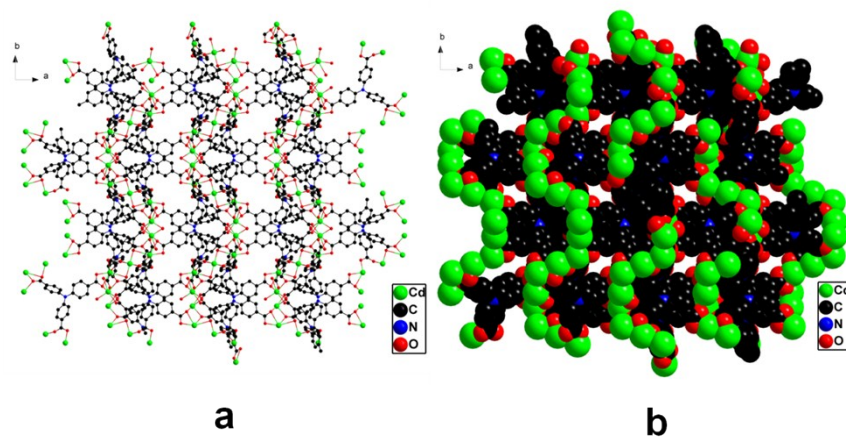

**Fig. S7** View of the 3D framework of **1** shown in Ball-Stick mode (a) and Spacefill mode (b) along the *c*-axis. All H atoms, counter ions and solvent molecules are omitted for clarity.

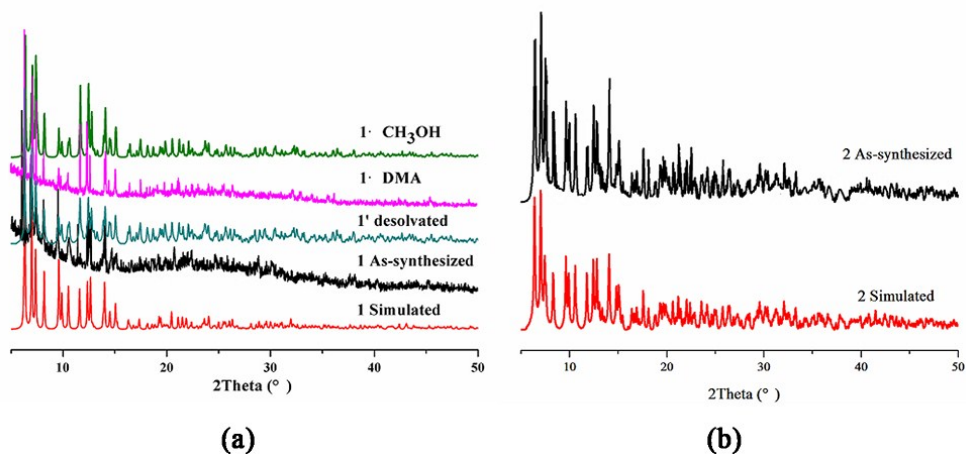

**Fig. S8** Powder XRD patterns of (a) **1**, **1'**, **1·DMA** and **1·CH<sub>3</sub>OH**; (b) **2** and its simulated one.

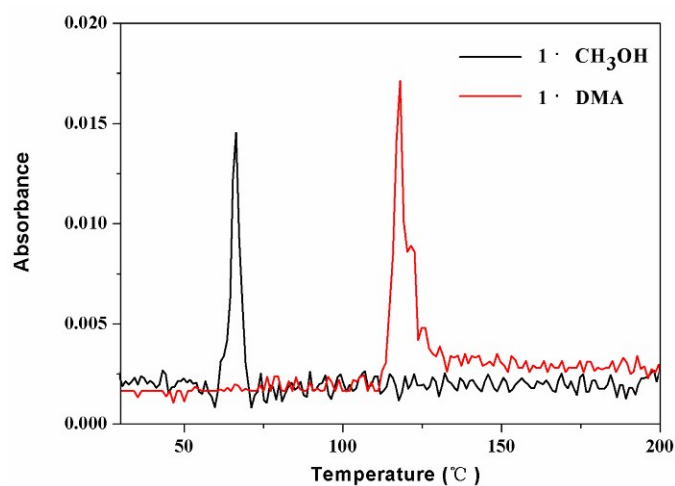

**Fig. S9** The corresponding Gram-Schmidt signal of **1·CH<sub>3</sub>OH** and **1·DMA**.

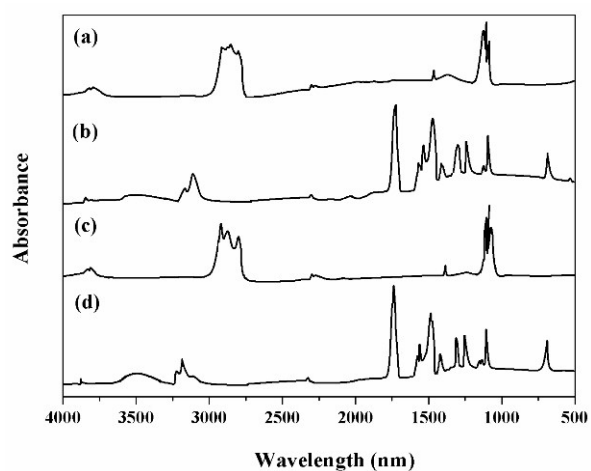

**Fig. S10** Gas phase IR spectra corresponding to the maximum of the Gram-Schmidt signal in Fig. 9 of (a) **1·CH<sub>3</sub>OH** and (b) **1·DMA** as well as reference spectra of (c) methanol and (d) N-dimethylacetamide.



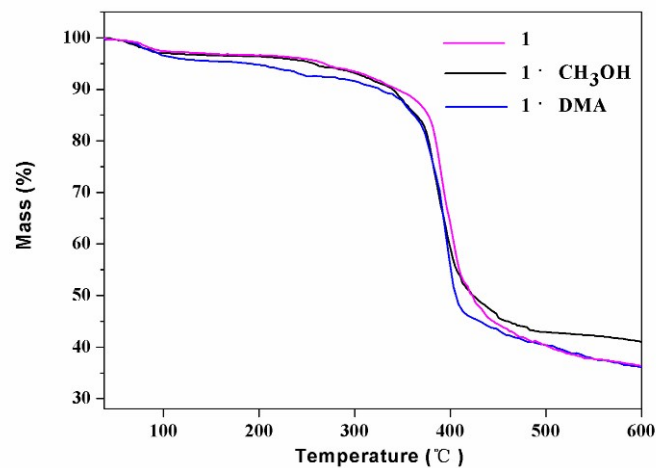

**Fig. S11** TG curves for **1**, **1·CH<sub>3</sub>OH** and **1·DMA** under a nitrogen atmosphere.

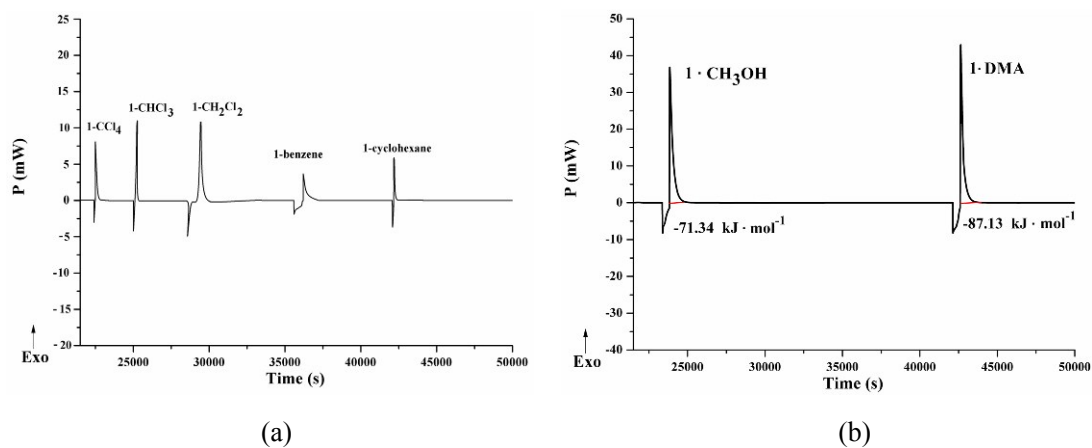

**Fig. S12** (a) Variation of heat-flow as a function of time, **1·CH<sub>2</sub>Cl<sub>2</sub>**, **1·CHCl<sub>3</sub>**, **1·CCl<sub>4</sub>**, **1·benzene**, and **1·cyclohexane**, (b) **1·CH<sub>3</sub>OH** and **1·DMA**.

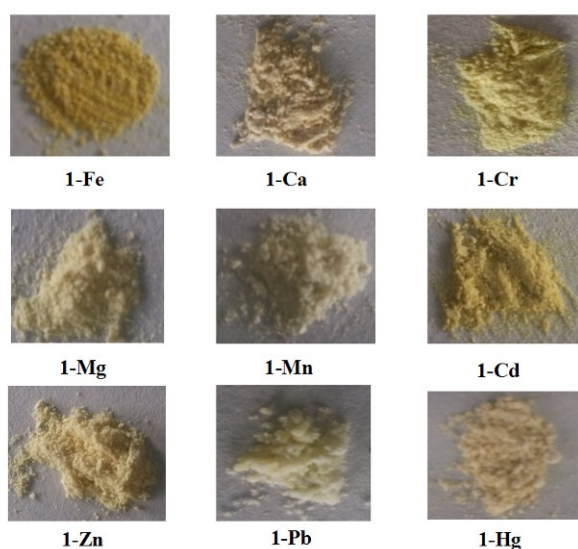

**Fig. S13** Changes in color of addition of various metal ions ( $1 \times 10^{-4}$  mol L<sup>-1</sup>, 10 mL) to the crystals of **1**.

(a)

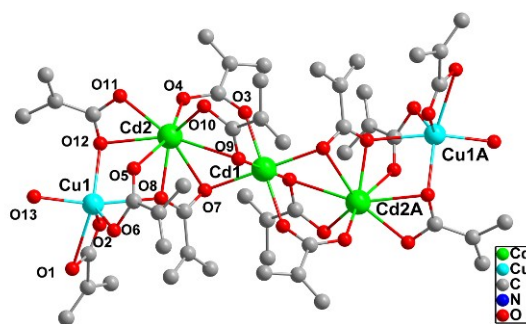

(b)

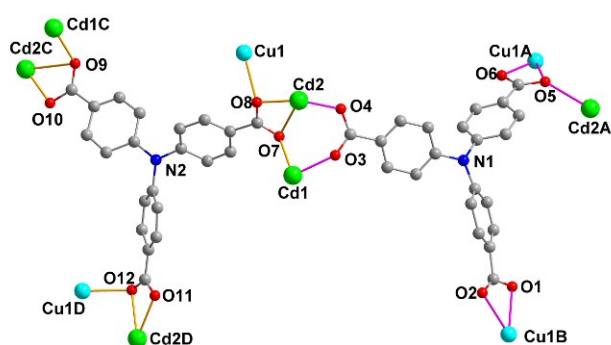

(c)

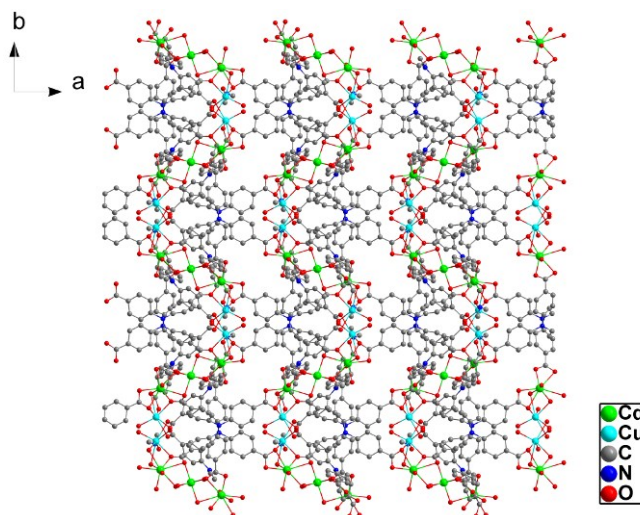

**Fig. S14** (a) Coordination environments of the Cd(II) and Cu(II) ions in **2**. Symmetry code: A,  $-x+1, -y, -z+2$ ; (b) Two different types of coordination modes of  $L^3$ - ligand in **2**. Symmetry code: A,  $x, y, z+1$ ; B,  $-x+1, y-1/2, -z+5/2$ ; C,  $-x+1, y+1/2, -z+3/2$ ; D,  $x+1, y, z$ ; (c) View of the 3D framework of **2** shown in Ball-Stick mode along the  $c$ -axis. All H atoms, counter ions and solvent molecules are omitted for clarity.

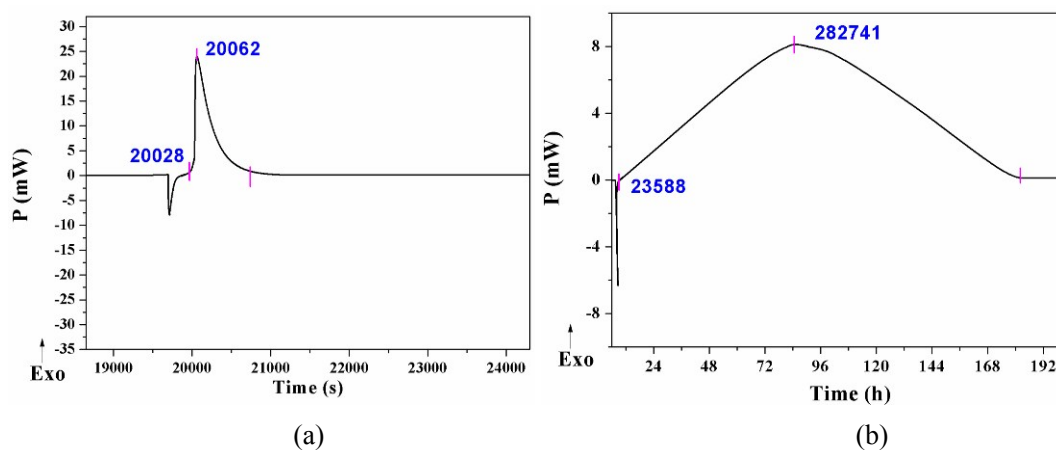

**Fig. S15** (a) Variation of heat-flow as a function of time,  $c(\text{Cu}^{2+}) = 1 \times 10^{-5} \text{ mol L}^{-1}$ , (b)  $c(\text{Cu}^{2+}) = 1 \times 10^{-6} \text{ mol L}^{-1}$ .

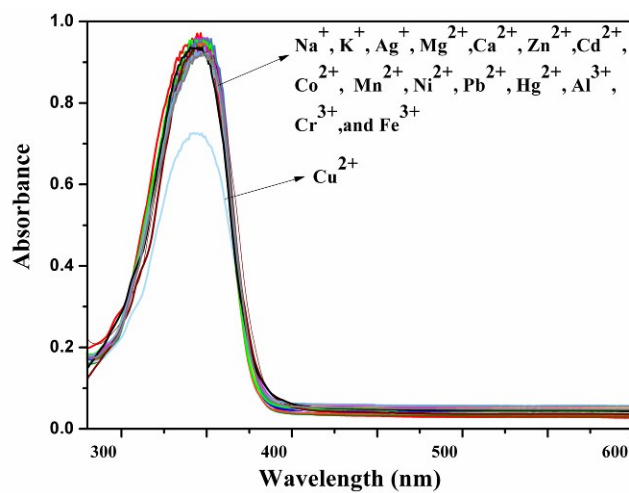

**Fig. S16** Change in absorption intensity of 1 ( $1 \times 10^{-5} \text{ M}$ ) in DMSO upon addition of various metal ions (10 mM).

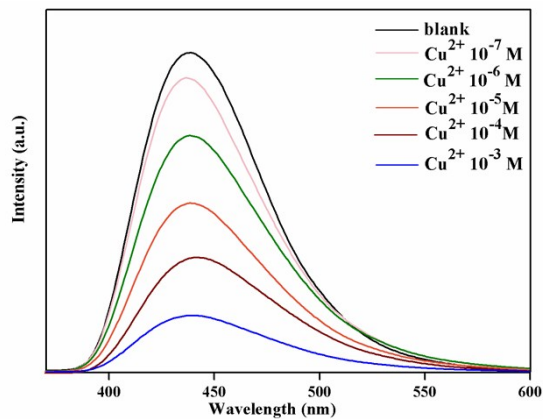

**Fig. S17** Emission spectra of 1 in DMSO with  $\text{Cu}(\text{NO}_3)_2$  at different concentrations.

**Table S1** Crystal data and refinement parameters for compounds **1**, **2**, **1·CH<sub>3</sub>OH** and **1·DMA**.

| Compound                                                        | <b>1</b>                                                                       | <b>2</b>                                                                                       | <b>1·CH<sub>3</sub>OH</b>                                                      | <b>1·DMA</b>                                                                   |
|-----------------------------------------------------------------|--------------------------------------------------------------------------------|------------------------------------------------------------------------------------------------|--------------------------------------------------------------------------------|--------------------------------------------------------------------------------|
| Empirical formula                                               | C <sub>88</sub> H <sub>72</sub> Cd <sub>5</sub> N <sub>6</sub> O <sub>28</sub> | C <sub>88</sub> H <sub>72</sub> Cd <sub>3</sub> Cu <sub>2</sub> N <sub>6</sub> O <sub>27</sub> | C <sub>90</sub> H <sub>76</sub> Cd <sub>5</sub> N <sub>6</sub> O <sub>28</sub> | C <sub>96</sub> H <sub>86</sub> Cd <sub>5</sub> N <sub>8</sub> O <sub>28</sub> |
| Formula weight                                                  | 2223.52                                                                        | 2109.80                                                                                        | 2251.57                                                                        | 2361.73                                                                        |
| Crystal system                                                  | Monoclinic                                                                     | Monoclinic                                                                                     | Monoclinic                                                                     | Monoclinic                                                                     |
| Space group                                                     | <i>P2<sub>1</sub>/c</i>                                                        | <i>P2<sub>1</sub>/c</i>                                                                        | <i>P2<sub>1</sub>/c</i>                                                        | <i>P2<sub>1</sub>/c</i>                                                        |
| <i>a</i> /Å                                                     | 14.6261(6)                                                                     | 14.3997(19)                                                                                    | 14.5830(13)                                                                    | 14.5196(9)                                                                     |
| <i>b</i> /Å                                                     | 23.2526(9)                                                                     | 23.362(3)                                                                                      | 23.241(2)                                                                      | 23.3670(14)                                                                    |
| <i>c</i> /Å                                                     | 15.7357(7)                                                                     | 15.543(3)                                                                                      | 15.6338(14)                                                                    | 15.6042(9)                                                                     |
| <i>α</i> /°                                                     | 90                                                                             | 90                                                                                             | 90                                                                             | 90                                                                             |
| <i>β</i> /°                                                     | 107.099(2)                                                                     | 106.309(9)                                                                                     | 106.990(2)                                                                     | 107.4750(10)                                                                   |
| <i>γ</i> /°                                                     | 90                                                                             | 90                                                                                             | 90                                                                             | 90                                                                             |
| <i>V</i> /Å <sup>3</sup>                                        | 5115.1(4)                                                                      | 5018.2(12)                                                                                     | 5067.4(8)                                                                      | 5049.8(5)                                                                      |
| <i>Z</i>                                                        | 2                                                                              | 2                                                                                              | 2                                                                              | 2                                                                              |
| <i>D<sub>c</sub></i> /(g·cm <sup>-3</sup> )                     | 1.444                                                                          | 1.396                                                                                          | 1.476                                                                          | 1.553                                                                          |
| <i>T</i> (K)                                                    | 296(2)                                                                         | 296(2)                                                                                         | 296(2)                                                                         | 296(2)                                                                         |
| F(000)                                                          | 2212                                                                           | 2120                                                                                           | 2244                                                                           | 2364                                                                           |
| Absorption coefficient/mm <sup>-1</sup>                         | 1.094                                                                          | 1.114                                                                                          | 1.106                                                                          | 1.114                                                                          |
| Reflections collected/unique                                    | 27989 / 8921                                                                   | 28070 / 8802                                                                                   | 19614 / 8639                                                                   | 24914 / 8877                                                                   |
| <i>R</i> (int)                                                  | 0.0320                                                                         | 0.1227                                                                                         | 0.0463                                                                         | 0.0407                                                                         |
| Goodness-of-fit on <i>F</i> <sup>2</sup>                        | 1.074                                                                          | 1.077                                                                                          | 1.071                                                                          | 1.076                                                                          |
| <i>R</i> <sub>1</sub> <sup>a</sup> [ <i>I</i> > 2σ( <i>I</i> )] | 0.0487                                                                         | 0.1094                                                                                         | 0.0563                                                                         | 0.0456                                                                         |
| w <i>R</i> <sub>2</sub> <sup>b</sup> (all data)                 | 0.1717                                                                         | 0.3219                                                                                         | 0.1818                                                                         | 0.1593                                                                         |
| CCDC number                                                     | 1417833                                                                        | 1417835                                                                                        | 1424110                                                                        | 1417834                                                                        |

[<sup>a</sup>]  $R_1 = \sum ||F_o| - |F_c|| / \sum |F_o|$

[<sup>b</sup>]  $wR_2 = [\sum w(F_o^2 - F_c^2)^2 / \sum w(F_o^2)^2]^{1/2}$

## References

- [S1] J. Wang, C. He, P. Y. Wu, J. Wang, C. Y. Duan, *J. Am. Chem. Soc.* **2011**, *133*, 12402–12405.
- [S2] M. Ji, M.Y. Liu, S.L. Gao, *Instrum. Sci. Technol.* **2001**, *29*, 53-57.
- [S3] V. K.J. Marthada, *Res. NBS Standards* **1980**, *85*, 467-470.
- [S4] S.L.Gao, Y. Fang, S.P. Chen, *Acta Chim. Sin.* **2002**, *60*, 2220-2224.
- [S5] Sheldrick, G. M. SADABS, Program for Empirical Absorption Correction; University of Göttingen, Göttingen, Germany, **1996**.
- [S6] Sheldrick, G. M. SHELXTL; Bruker Analytical X-ray Instruments Inc., Madison, WI, **1998**
